# Model of SNARE-Mediated Membrane Adhesion Kinetics

Jason M. Warner<sup>1</sup>, Erdem Karatekin<sup>2</sup>, Ben O'Shaughnessy<sup>3\*</sup>

**1** Jason M. Warner, Department of Chemical Engineering, Columbia University, New York, New York, United States of America, **2** Erdem Karatekin, Institut de Biologie Physico-Chimique, Centre National de la Recherche Scientifique UPR 1929, Paris, France, **3** Ben O'Shaughnessy, Department of Chemical Engineering, Columbia University, New York, New York, United States of America

## Abstract

SNARE proteins are conserved components of the core fusion machinery driving diverse membrane adhesion and fusion processes in the cell. In many cases micron-sized membranes adhere over large areas before fusion. Reconstituted *in vitro* assays have helped isolate SNARE mechanisms in small membrane adhesion-fusion and are emerging as powerful tools to study large membrane systems by use of giant unilamellar vesicles (GUVs). Here we model SNARE-mediated adhesion kinetics in SNARE-reconstituted GUV-GUV or GUV-supported bilayer experiments. Adhesion involves many SNAREs whose complexation pulls apposing membranes into contact. The contact region is a tightly bound rapidly expanding patch whose growth velocity  $v_{\text{patch}}$  increases with SNARE density  $\Gamma_{\text{snare}}$ . We find three patch expansion regimes: slow, intermediate, fast. Typical experiments belong to the fast regime where  $v_{\text{patch}} \sim (\Gamma_{\text{snare}})^{2/3}$  depends on SNARE diffusivities and complexation binding constant. The model predicts growth velocities  $\sim 10\text{--}300\ \mu\text{m/s}$ . The patch may provide a close contact region where SNAREs can trigger fusion. Extending the model to a simple description of fusion, a broad distribution of fusion times is predicted. Increasing SNARE density accelerates fusion by boosting the patch growth velocity, thereby providing more complexes to participate in fusion. This quantifies the notion of SNAREs as dual adhesion-fusion agents.

**Citation:** Warner JM, Karatekin E, O'Shaughnessy B (2009) Model of SNARE-Mediated Membrane Adhesion Kinetics. PLoS ONE 4(8): e6375. doi:10.1371/journal.pone.0006375

**Editor:** Jörg Langowski, German Cancer Research Center, Germany

**Received:** April 8, 2009; **Accepted:** June 10, 2009; **Published:** August 3, 2009

**Copyright:** © 2009 Warner et al. This is an open-access article distributed under the terms of the Creative Commons Attribution License, which permits unrestricted use, distribution, and reproduction in any medium, provided the original author and source are credited.

**Funding:** We gratefully acknowledge financial support from the NSF through IGERT RFCUNY 404340001A for J.W. The funders had no role in study design, data collection and analysis, decision to publish, or preparation of the manuscript.

**Competing Interests:** The authors have declared that no competing interests exist.

\* E-mail: bo8@columbia.edu

## Introduction

In cells the controlled delivery of materials packaged by membrane-bound organelles and vesicles is achieved by membrane fusion. SNARE proteins are involved in most intracellular eukaryotic fusion processes [1] and have been termed the fusion “workhorses” [2] and the “minimal fusion machinery” [3]. SNAREs dock membranes in preparation for fusion: a t-SNARE in one membrane binds its cognate v-SNARE partner in the apposing membrane, forming a SNARE complex as their cytoplasmic domains combine into a four-helix bundle [4]. For example, in the presynaptic membrane syntaxin and SNAP25 form a t-SNARE acceptor complex that binds the v-SNARE synaptobrevin provided by the synaptic vesicle [1]. The resulting helical bundle contains one helix from syntaxin, one from synaptobrevin and two from a single SNAP25 molecule [4]. The crystal structure of the SNARE complex suggests that its complete assembly pulls membranes into close contact [4].

It has been postulated that SNAREs are dual adhesion-fusion agents. Subsequent to bringing membranes into intimate contact, it has been proposed that SNAREs trigger fusion [3] though additional proteins are thought to be involved [2]. The SNARE complex is highly stable, suggesting assembly may release work to drive fusion [2]. However, the role of SNAREs in the fusion step remains unsettled. Fusion was prevented or reduced when *trans* complex assembly was blocked in PC12 [5] and chromaffin cells [6], but not for yeast vacuoles [7] or sea urchin egg vesicles [8].

Identifying and quantifying the role played by SNAREs is challenging because the complex cellular fusion machinery

involves many components. A substantial body of *in vitro* studies [3,9–14] has sought to isolate their contribution by reconstituting SNAREs into synthetic small unilamellar vesicles (SUVs) and supported bilayers (SBLs). These studies illuminated both SNARE-mediated adhesion and fusion mechanisms. One study concluded that only one SNARE complex is required for SUV-SBL docking [12]. Liu et al [10] found diffusion-limited docking rates, i. e. a SUV is almost instantly captured by nearby SBL t-SNAREs. In reconstituted synaptic SNARE systems typical measured fusion times are  $\sim 10$  min and  $\sim 10$  s in, respectively, SUV-SUV [3,9] and SUV-SBL [11,12] systems.

SUV studies have contributed significantly to current understanding of SNARE function. Nonetheless questions remain as to the cellular relevance of *in vitro* mechanisms. Typical measured fusion times greatly exceed the  $\sim 1$  ms required for synaptic vesicle fusion [15]. Though  $\sim 25$  ms has been achieved *in vitro*, SNAP25 was not required [10] suggesting the fusion may have been non-specific, mediated by weak syntaxin-synaptobrevin binding [1]. One study reported SNAREs did not trigger SUV fusion alone but could promote fusion of PEG-aggregated SUVs [13]. A possible complication is that *in vitro* fusion events may result from the small sub-population of vesicles rendered inherently unstable by particularly high curvature and SNARE:lipid ratios [14].

Most *in vitro* studies have used  $\sim 50$ -nm SUVs, appropriate to processes such as synaptic transmission where 50-nm vesicles fuse with the presynaptic plasma membrane  $\sim 1$  ms after  $\text{Ca}^{2+}$  stimulation [2,16]. However micron-sized membranes are involved in many processes such as adhesion and fusion of yeast vacuoles lasting tens of seconds [2,17]. These membranes contain

many SNAREs and adhere over areas  $\sim 1 \mu\text{m}^2$  before fusion [17]. Other examples include large vesicle ( $\sim 1 \mu\text{m}$  diameter) trafficking [18], lysosome ( $0.4\text{--}0.7 \mu\text{m}$ ) fusion [19] and exocytosis of acrosomal vesicles ( $>1 \mu\text{m}$ ) [20] and cortical granules ( $\sim 1 \mu\text{m}$ ) [21]. Flipped SNAREs mediate cell-cell adhesion over areas  $\sim 100 \mu\text{m}^2$  [22].

To mimic large membrane cellular fusion systems it is natural to turn to *giant* unilamellar vesicles (GUVs). Studies have begun to realize the potential of SNARE-reconstituted GUVs as model *in vitro* systems which may reveal mechanisms of adhesion and fusion of micron-scale membrane compartments. Bacia et al [23] reconstituted labeled SNAREs into  $\sim 10 \mu\text{m}$  GUVs and showed the SNAREs bound with their solubilized cognates. SNARE spatial distributions were visualized and their in-membrane diffusivities measured. Another recent study showed that t-SNARE-reconstituted large unilamellar vesicles (LUVs) adhered and fused with v-SNARE GUVs [24]. On average at least 2 LUVs were bound to each GUV and were mobile on the GUV surface. Lipid mixing kinetic data indicated a fusion rate  $\approx 0.05/\text{min}$  per  $100 \mu\text{m}^2$  of GUV membrane [24]. Assuming irreversible docking and taking GUV diameter  $\sim 10 \mu\text{m}$  this suggests LUVs remained adhered for at least 14 min on average before fusion.

In this paper we develop a model of SNARE-mediated adhesion kinetics in controlled SNARE-reconstituted GUV-GUV or GUV-SBL systems. We discuss experiments where such adhesion kinetics could be followed and GUV membrane tension and SNARE surface densities precisely controlled (see Proposed Experiments and Fig. 1). Since contact areas are large, many SNAREs may be involved and the ensuing adhesion and fusion kinetics may reflect collective behavior qualitatively distinct from that in SUV systems.

Our model predicts that after first membrane contact a growing adhesion patch develops as increasing numbers of SNARE complexes bridge the membranes (see Fig. 1). The adhesion kinetics and SNARE density profiles depend on membrane tension and initial SNARE densities in the membranes and quantitatively reflect basic SNARE properties such as in-membrane diffusivities and the SNARE complexation rate constant  $k_{\text{snare}}$ .

Though adhesion is our focus, we briefly consider fusion kinetics. The formation of large many-SNARE adhesion domains may lie on the pathway to large membrane fusion (Fig. 1F). There is evidence for this sequence in LUV-GUV systems [24], yeast vacuole fusion [17] and intercellular fusion mediated by flipped SNAREs [22]. Since it is unknown if SNAREs work collectively, to model fusion kinetics we invoke the simplest assumption that each SNARE complex *independently* triggers fusion with a certain mean waiting time. We will show this leads to an effective coupling between adhesion and fusion: the larger the adhesion patch the more assembled SNARE complexes and so the greater the net fusion probability per unit time and the smaller the overall mean fusion waiting time.

A SNARE and its cognate partner is an example of a biosticker-ligand pair (albeit one which may additionally catalyze fusion). Surface adhesion by other biosticker systems was observed to progress by growth of tightly bound patches, including GUV-substrate adhesion [25–28] and cell spreading [29–31]. Boulbitch et al [25] found two regimes of adhesion patch growth between ligand-bearing GUVs and integrin-covered substrates: at low ligand densities patch radius  $R_p \sim t^{1/2}$  after time  $t$  in accord with a predicted ligand-diffusion-limited regime while at high densities  $R_p \sim t$  consistent with a predicted binding-kinetics-limited regime.

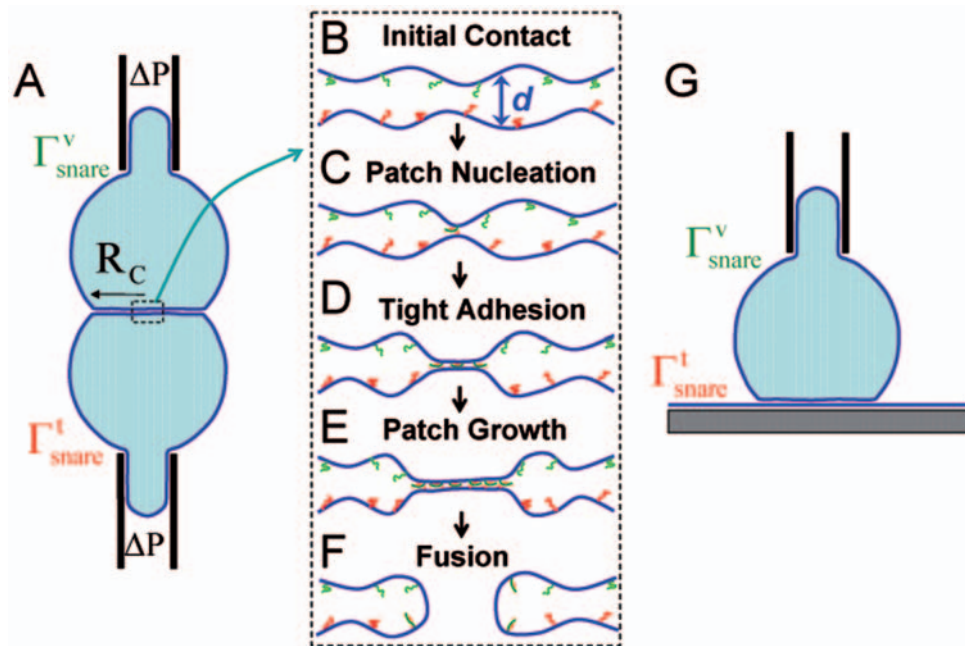

**Figure 1. Schematics of proposed *in vitro* experiments following SNARE-mediated adhesion and fusion kinetics.** (A) GUVs reconstituted with t-SNAREs (red, surface density  $\Gamma_{\text{snare}}^t$ ) and v-SNAREs (green, surface density  $\Gamma_{\text{snare}}^v$ ) are aspirated into micropipettes and pushed together generating a contact zone of radius  $R_c$ . Aspiration pressure  $\Delta P$  controls membrane tension  $\gamma$ . Due to GUV size, patch evolution and fusion may be followed by various optical microscopy techniques in real time. (b–f) Blow-up of box in (A). (B) Tension determines the initial membrane separation in the contact zone,  $d = C(kT/\gamma)^{1/2}$ ; below this separation, membranes are strongly repulsive due to entropic membrane fluctuations (omitted in (A) for clarity). Complexation is hindered because  $d$  is larger than SNARE reach. (C) A membrane fluctuation brings SNAREs together, nucleating tight adhesion at time  $t=0$ . (D,E) Growth of the adhesion patch at velocity  $v_{\text{patch}}$ . Complex assembly is facilitated by closeness of membranes in the patch. (F) SNARE complexes trigger fusion at time  $T_{\text{fusion}}$ . (G) Similar to (A) but t-SNARE membrane is now a SBL. Reflection interference contrast microscopy (RICM) is an ideal technique to follow patch areal growth. doi:10.1371/journal.pone.0006375.g001

Cuvelier and Nassoy [26] found  $R_p \sim t^{1/2}$  in adhesion of streptavidin-coated GUVs to biotin substrates at low streptavidin densities while at saturating densities patch velocity decreased exponentially in time. They modeled the two regimes as, respectively, diffusion-controlled and viscous dissipation-limited.

Since SNAREs and their complexes are apparently *mobile* [24] SNARE-mediated adhesion kinetics presumably differ fundamentally from those discussed above where one of each sticker-ligand pair was *immobilized* on a substrate. Thus different mathematical models are necessary to describe SNARE adhesion. Mobile complexes may exert 2D osmotic pressure tending to enlarge a patch. De Gennes, Puech, and Brochard-Wyart [32] modeled this class of situations and found patch growth is initially binding-kinetics-limited with  $R_p \sim t^{5/2}$  and then attains constant speed in steady state,  $R_p = vt$ . Assuming *uniform* complex density in the patch they predicted growth velocity  $v$  increases as the  $3/2$  power of receptor and sticker density. In this paper we explicitly calculate SNARE density profiles and show that in fast growing patches the complex density is in fact severely depleted at the boundary. Osmotic pressure and growth rate are thus diminished and a different power law results. Using properties taken from the literature we find typical SNARE systems belong to this fast growth regime.

In our model the origin of adhesion patch growth is that the initial tension-dependent mean membrane separation in the GUV-GUV or GUV-SBL contact zone (Fig. 1B) normally exceeds the reach of cognate SNAREs ( $\sim 8$  nm [33]). Hence the first complexation event is a slow process, requiring SNAREs to connect across this large gap (Fig. 1C). Once achieved, however, the tight membrane contact in this location accelerates further SNARE binding (Fig. 1D,E). Thus a patch grows, driven by SNARE complex osmotic pressure and resisted by viscous drag. The force balance results in a growth speed  $v_{\text{patch}}$ .

In the Discussion the possible relevance of these results to cellular fusion pathways is addressed. Tight SNARE adhesion is preceded by loose binding by tethering factors. Given typical tether sizes (e.g.  $\sim 30$  nm for the exocyst [34]) the initial membrane separation may exceed SNARE reach which for large membranes may lead to self-promoting SNARE adhesion patches similar to those predicted here for *in vitro* systems.

## Proposed experiments

Before introducing the model we first describe proposed experiments yet to be performed which can test our predictions. The model directly describes *in vitro* experiments of the type shown in Fig. 1. One GUV is reconstituted with t-SNAREs (surface density  $\Gamma_{\text{snare}}^t$ ) while the second GUV or the SBL is reconstituted with cognate v-SNAREs (density  $\Gamma_{\text{snare}}^v$ ). GUV membrane tensions  $\gamma$  would be controlled by micropipette suction pressure [35] or by using heavy GUVs in the GUV-SBL setup [36].

The total GUV-GUV or GUV-SBL contact area  $A_c$  is controlled by pressing the surfaces into contact or by a balance of gravitational forces and membrane tension in the heavy GUV-SBL setup [36]. In this contact zone, the initial membrane separation  $d$  is controlled by the applied pressure and the surface tension  $\gamma$ , the latter set by micropipette suction. Repulsive electrostatic forces overcome non-specific van der Waals adhesion provided the fraction  $\phi$  of negatively charged lipids is sufficiently large (Evans found the requirement  $\phi \geq 0.07$  in physiological salt solutions, 0.1 M NaCl [37]). The mean separation is then governed by entropic membrane undulations. Theory predicts [38,39]

$$d = C(kT/\gamma)^{1/2}, \quad (1)$$

where  $kT$  is the thermal energy at temperature  $T$  and  $C$  depends only logarithmically on tension and applied pressure. This result is valid for sufficiently low tensions where  $d$  exceeds the range of electrostatic, van der Waals, and hydration forces which decay rapidly with separation. The result follows, for example, if one sets van der Waals forces to zero in ref. [39].

An adhesion patch is expected to nucleate since undulations occasionally bring cognate SNAREs together. In the GUV-SBL arrangement the subsequent patch growth kinetics can be monitored using reflection interference contrast microscopy (RICM, see Fig. 1G). The large dimensions of GUVs enable other optical microscopic techniques [23,35,40].

## Methods

### Model

**Initial conditions.** We model GUV-GUV or GUV-SBL adhesion in experiments described in the previous section. (The “vesicle-vesicle” language will be used.) For simplicity the symmetric case is assumed: both vesicles have equal numbers of SNAREs per unit area in their respective membranes,  $\Gamma_{\text{snare}}$ . Before complexation the vesicles are separated by a distance  $d$  exceeding the SNARE complexation reach  $R_{\text{snare}}$  over a large contact area  $A_c$  (Fig. 1).

**Objectives of model.** The first SNARE complex assembles at time  $t=0$ , nucleating a tightly bound adhesion patch whose radius  $R_p(t)$  subsequently grows as more complexes form (Fig. 1C–E). The patch is self-promoting: once nucleated, it provides a reduced intermembrane separation zone where complexation is easier.

Our interest is steady state patch growth where the velocity  $v_{\text{patch}} \equiv dR_p/dt$  is constant. Our principal goal is to predict how the steady state  $v_{\text{patch}}$  depends on vesicle SNARE densities  $\Gamma_{\text{snare}}$ , membrane tensions  $\gamma$ , SNARE diffusivities and the complexation rate constant  $k_{\text{snare}}$ . The rate constant is a fundamental SNARE property measuring kinetics of complexation “reactions” characterized by “capture radius”  $R_{\text{snare}}$ .

To calculate  $v_{\text{patch}}$  the steady state SNARE profile  $\Gamma_s(x)$  in each vesicle must be determined. Deep inside the patch this falls to zero due to complexation, while far from the patch this tends to the initial value  $\Gamma_{\text{snare}}$ . The SNARE complex profile,  $\Gamma_c(x)$ , vanishes outside the patch by definition; once a complex forms it is trapped in the patch by the connection created.

**Patch growth velocity results from balance of osmotic pressure and drag forces.** Patch growth is driven by the 2D osmotic pressure  $\Pi$  of SNARE complexes [32,41]. Pressure is mediated by the membrane diffusivity  $D_c$  of complexes. Assuming ideal gas statistics, the osmotic pressure is

$$\Pi(\Gamma_c^*) = kT\Gamma_c^* \quad (2)$$

where  $\Gamma_c^*$  is the complex density at the patch boundary.

In steady state the outward osmotic pressure is balanced by dissipative drag forces  $\Pi_{\text{drag}}$  opposing growth (see Fig. 2). These dissipative forces are of complex origin and presumably include dissipation due to expulsion of intermembrane fluid accompanying patch growth. Thus we adopt a simple linear relation with drag coefficient  $\eta_d$  whose dimensions are viscosity and whose value is in principle available from experimental measurement of patch growth,

$$\Pi_{\text{drag}}(v_{\text{patch}}) = \eta_d v_{\text{patch}} \quad (3)$$

As fluid is not expected to significantly penetrate the patch, dissipation occurs primarily in a narrow band along its boundary.

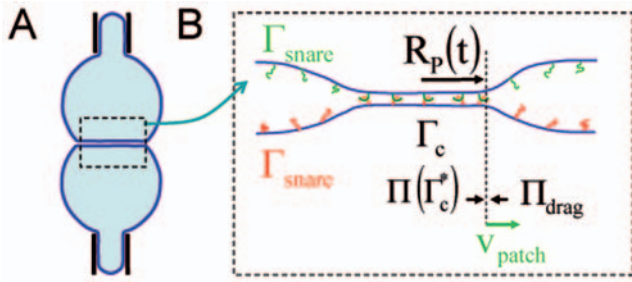

**Figure 2. Model of SNARE-mediated adhesion: schematic of patch growth.** Following nucleation SNARE complexes (density  $\Gamma_c$ ) assemble inside a tightly bound adhesion patch (radius  $R_p(t)$ ). t-SNAREs (red, surface density  $\Gamma_{\text{snare}}$ ) and v-SNAREs (green, density  $\Gamma_{\text{snare}}$ ) can bind only inside the patch where the membrane separation is sufficiently small. Complexes near the patch boundary at density  $\Gamma_c^*$  exert 2D osmotic pressure  $\Pi(\Gamma_c^*)$  on the boundary. This drives patch growth at velocity  $v_{\text{patch}}$  determined by a balance of  $\Pi(\Gamma_c^*)$  and the velocity-dependent resistive force per unit length  $\Pi_{\text{drag}}(v_{\text{patch}})$ . doi:10.1371/journal.pone.0006375.g002

The coefficient  $\eta_d$  measures dissipation per unit length of patch boundary and is independent of patch size. More generally  $\eta_d$  is the local slope of the drag-velocity relation. The steady state patch velocity satisfies the force balance  $\Pi(\Gamma_c^*) = \Pi_{\text{drag}}(v_{\text{patch}})$  (see Fig. 2), yielding a linear dependence on the complex density at the patch boundary,

$$v_{\text{patch}} = \frac{kT\Gamma_c^*}{\eta_d}. \quad (4)$$

Since a patch grows within contact zone of area  $A_c$  and patch area is much less than  $A_c$  (Fig. 1) patch growth does not increase vesicle surface area and elevate surface tension which would resist growth.

**Equations governing steady state density profiles.** To obtain the patch velocity  $v_{\text{patch}}$  from eq. 4 we must determine the complex density at the boundary,  $\Gamma_c^*$ . This can only be obtained by calculating the steady state complex density profile in space  $\Gamma_c(x)$ , which in turn depends on  $v_{\text{patch}}$ . Thus the profile equations are solved simultaneously with eq. 4 as a dynamic boundary condition at the patch edge (see below).

For simplicity we assume the two SNARE types have equal diffusivities  $D_s$ . The diffusivity of complexes is expected to be smaller,  $D_c < D_s$ . A cognate pair can complex only if both SNAREs diffuse into the patch. Complexation then follows 2nd order “reaction” kinetics characterized by a 2D rate constant  $k_{\text{snare}}$ . A 2D framework is valid provided the membranes are sufficiently closely adhered. This is satisfied for typical experimental SNARE densities (see Supplementary Material S1). Irreversibility is assumed since the SNARE complex is highly stable [42].

We seek equations governing the steady state densities. In the region close to the patch boundary densities will change substantially as a function of position. Provided the patch radius is much larger than the size of this region, the situation becomes approximately 1D in the direction orthogonal to the patch boundary,  $x$ , and the far field boundary conditions are in effect at  $x = \pm\infty$ . During steady state growth the density fields are unchanging in a frame of reference moving with the boundary. We name this density field for the SNAREs  $\Gamma_s(x)$  where  $x$  is distance from the boundary, and similarly  $\Gamma_c(x)$  for the complexes. (Note the SNARE density profile  $\Gamma_s(x)$  is the same in each vesicle by symmetry.) In Supplementary Material S1 it is shown these obey

$$-v_{\text{patch}} \frac{d\Gamma_s}{dx} = D_s \frac{d^2\Gamma_s}{dx^2} - k(x)\Gamma_s^2, \quad -v_{\text{patch}} \frac{d\Gamma_c}{dx} = D_c \frac{d^2\Gamma_c}{dx^2} + k(x)\Gamma_s^2, \quad (5)$$

where

$$k(x \leq 0) = k_{\text{snare}}, \quad k(x > 0) = 0, \quad v_{\text{patch}} = \frac{kT\Gamma_c^*}{\eta_d}, \quad \Gamma_c^* \equiv \Gamma_c(x=0) \quad (6)$$

and the boundary conditions are

$$\left[ \frac{d\Gamma_c}{dx} \right]_{x=0} = -\frac{v_{\text{patch}}\Gamma_c^*}{D_c}, \quad \Gamma_s(x=\infty) = \Gamma_c(x=-\infty) = \Gamma_{\text{snare}}. \quad (7)$$

Each of eqs. 5 consists of a convective term proportional to  $v_{\text{patch}}$ , a diffusive term involving the relevant diffusivity, and a 2nd order complexation “reaction” term of magnitude  $k_{\text{snare}}\Gamma_s^2$  within the patch ( $x < 0$ ). For a given SNARE density  $\Gamma_{\text{snare}}$ , the task is to solve eqs. 5, 6, and 7. Choosing  $v_{\text{patch}}$  arbitrarily in eq. 5 would generate density profiles which would then define a velocity  $kT\Gamma_c^*/\eta_d$ ; the correct patch velocity choice satisfies  $v_{\text{patch}} = kT\Gamma_c^*/\eta_d$ . Ultimately the system eqs. 5, 6 and 7 will yield density profiles and a patch velocity  $v_{\text{patch}}$  as a function of SNARE density  $\Gamma_{\text{snare}}$ .

## Results

### Exact Scaling Results for Patch Growth Velocity $v_{\text{patch}}$

In this subsection we use scaling analysis to solve eqs. 4–7 for the steady state patch velocity  $v_{\text{patch}}$ . Results are presented first, followed by a brief summary of the analysis. A more detailed analysis is presented in Supplementary Material S1. Depending on the SNARE density  $\Gamma_{\text{snare}}$ , we find patch growth belongs to one of three regimes: fast, intermediate or slow. Our scaling results are exact deep within each regime where  $v_{\text{patch}}$  depends on  $\Gamma_{\text{snare}}$  with a regime-specific power law:

$$\frac{v_{\text{patch}}}{v_0} = \begin{cases} \Gamma_{\text{snare}}/\Gamma_0, & \Gamma_{\text{snare}} < \Gamma_{\text{crit}}^1 \text{ (slow)} \\ \epsilon^{2/5} \mu^{1/5} (\Gamma_{\text{snare}}/\Gamma_0)^{4/5}, & \Gamma_{\text{crit}}^1 < \Gamma_{\text{snare}} < \Gamma_{\text{crit}}^2 \text{ (intermediate)}, \\ \mu^{1/3} (\Gamma_{\text{snare}}/\Gamma_0)^{2/3}, & \Gamma_{\text{snare}} > \Gamma_{\text{crit}}^2 \text{ (fast)} \end{cases} \quad (8)$$

where the diffusivities and complexation rate constant enter only through the dimensionless combinations

$$\epsilon \equiv \frac{D_c}{D_s}, \quad \mu \equiv \frac{k_{\text{snare}}}{D_c} \quad (9)$$

and the characteristic scales for SNARE density and patch velocity are

$$\Gamma_0 = \left( \frac{D_c \eta_d}{kT} \right)^2, \quad v_0 = \frac{D_c^2 \eta_d}{kT}. \quad (10)$$

The regime boundaries are defined by two critical densities

$$\Gamma_{\text{crit}}^1 = \epsilon^2 \left( \frac{\eta_d}{kT} \right)^2 k_{\text{snare}} D_c, \quad \Gamma_{\text{crit}}^2 = \epsilon^{-3} \left( \frac{\eta_d}{kT} \right)^2 k_{\text{snare}} D_c. \quad (11)$$



Note the intermediate regime exists because we assume SNARE diffusivity exceeds that of the complex ( $\epsilon < 1$ ). In subsequent subsections exact numerical solutions are presented which validate these scaling predictions. Realistic parameter values will then be used to obtain quantitative patch velocity predictions. We estimate that typical experimental densities belong to the fast regime,  $\Gamma_{\text{snare}} > \Gamma_{\text{crit}}^2$  (see Parameter Values subsection).

**Derivation of Scaling Results**

In this subsection we use our model to derive the results for patch velocity of eqs. 8–11. We find the velocity has power law dependence on SNARE density, with a different power in each of 3 regimes. The calculations below use scaling analysis. Later exact numerical solutions of the model equations (eqs. 4–7) will be presented which confirm the scaling results.

Initially both adhering vesicles have uniform SNARE density,  $\Gamma_{\text{snare}}$ . Subsequently SNARE complexation grows a patch. The SNARE complex density  $\Gamma_c^*$  at the patch boundary drives patch growth,  $v_{\text{patch}} = kT\Gamma_c^*/\eta_d$  (eqs. 4, 6). In steady state the complex density deep inside the patch must equal  $\Gamma_{\text{snare}}$  by number conservation, but depletion of complex density may occur near the boundary,  $\Gamma_c^* \leq \Gamma_{\text{snare}}$ . The extent of depletion and thus patch velocity depend on which regime a system belongs to (slow, intermediate or fast), which is determined by the SNARE-density-dependent ordering of three key length scales illustrated in Fig. 3. The first two scales are the diffusion lengths for uncomplexed SNAREs  $l_{\text{snare}} \equiv D_s/v_{\text{patch}}$  and for complexes  $l_{\text{comp}} \equiv D_c/v_{\text{patch}}$ . On length scales smaller than a given diffusion scale, diffusion is much faster than coherent patch boundary motion at velocity  $v_{\text{patch}}$ . That is, the diffusive relaxation of the density profile on smaller scales than the corresponding diffusion length is so rapid that in effect the patch boundary is stationary during the relaxation episode. Note  $l_{\text{snare}} > l_{\text{comp}}$ . The third scale is the penetration depth  $\delta_{\text{snare}}$  of the SNARE density profile into the patch. This is the typical separation between a SNARE’s location and the patch boundary at the instant when it complexes with a cognate SNARE, determined both by its own diffusion and the boundary movement. Another key quantity is the density of uncomplexed SNAREs at the patch boundary,  $\Gamma_s^*$ , which may be depleted relative to the initial SNARE density,  $\Gamma_s^* \leq \Gamma_{\text{snare}}$ .

**Slow regime,**  $\delta_{\text{snare}} < l_{\text{comp}} < l_{\text{snare}}$  (Fig. 3A). We define this regime to be that where these three length scales are thus ordered. We will now show that this ordering is only true provided the SNARE density  $\Gamma_{\text{snare}}$  is less than a certain value,  $\Gamma_{\text{crit}}^1$ . Now SNARE complexes are generated within the length  $\delta_{\text{snare}}$  of the patch boundary. Since this is within the complex diffusion length  $l_{\text{comp}}$  of the boundary, these newly created complexes are well mixed by diffusion so  $\Gamma_c^* \approx \Gamma_{\text{snare}}$  is undepleted. This immediately gives the slow regime patch velocity result of eq. 8,  $v_{\text{patch}} = kT\Gamma_{\text{snare}}/\eta_d$ . This regime is valid for small velocities where  $l_{\text{comp}}$  is larger than the SNARE penetration depth  $\delta_{\text{snare}}$ . To determine this latter scale, note that the survival time  $\approx (k_{\text{snare}}\Gamma_s^*)^{-1}$  of an uncomplexed SNARE entering the patch is determined by the SNARE density at the boundary  $\Gamma_s^*$ . Since  $l_{\text{snare}} > \delta_{\text{snare}}$  its displacement relative to the boundary during this period is dominated by its own diffusion, i. e. it penetrates the patch a distance  $\delta_{\text{snare}} \approx (D_s/(k_{\text{snare}}\Gamma_s^*))^{1/2}$ . A second relation results from equating the rate of increase in the number of complexes in the patch to the complex production rate:  $k_{\text{snare}}\Gamma_s^*2\delta_{\text{snare}} \approx v_{\text{patch}}\Gamma_{\text{snare}}$ . Eliminating  $\Gamma_s^*$  from these two relations one finds that  $\delta_{\text{snare}} < l_{\text{comp}}$  is only true if  $\Gamma_{\text{snare}} < \Gamma_{\text{crit}}^1$  where  $\Gamma_{\text{crit}}^1$  is given by the expression of eq. 11. It follows that this value of the SNARE density defines the upper limit of the slow regime.

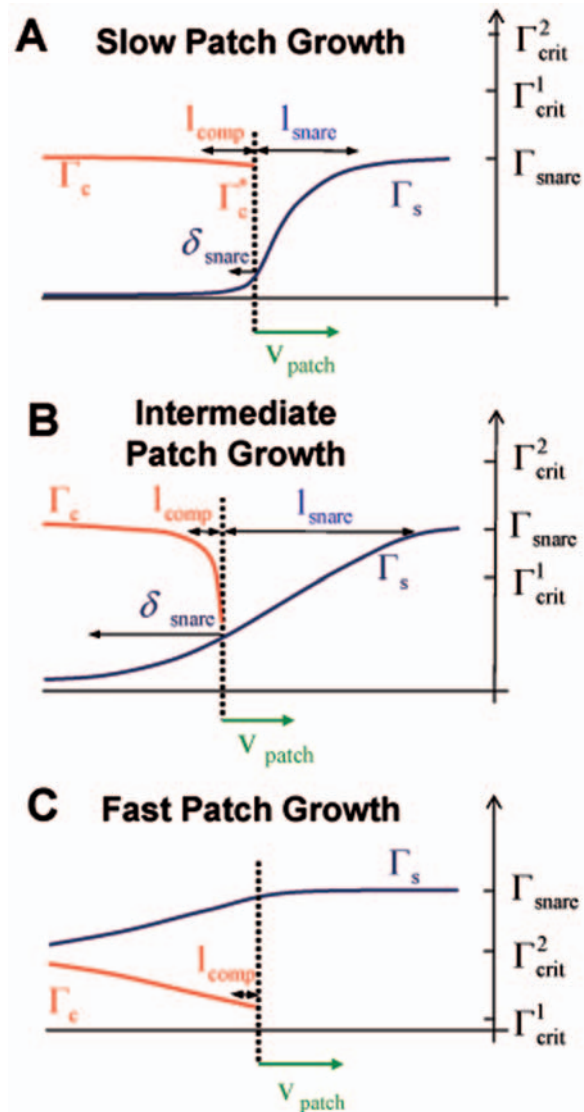

**Figure 3. Schematic of steady state SNARE density profiles.** Dashed line represents patch boundary moving with velocity  $v_{\text{patch}}$ , with patch to left of boundary. Uncomplexed SNAREs (density profile  $\Gamma_s$ , blue) bind within patch forming complexes (density profile  $\Gamma_c$ , red). Far outside (inside) patch  $\Gamma_s$  ( $\Gamma_c$ ) approaches the initial SNARE density,  $\Gamma_{\text{snare}}$ . The vertical axis indicates the density scale and shows how  $\Gamma_{\text{snare}}$  compares to two constant density values,  $\Gamma_{\text{crit}}^1$  and  $\Gamma_{\text{crit}}^2$ . (A) Slow patch growth ( $\Gamma_{\text{snare}} < \Gamma_{\text{crit}}^1$ ). SNAREs bind rapidly inside the boundary and a diffusion-depleted zone of SNAREs develops outside the patch. The SNARE profile penetrates a small distance  $\delta_{\text{snare}}$  into the patch. Because the boundary moves slowly compared to complex diffusion the complex diffusion length  $l_{\text{comp}}$  exceeds  $\delta_{\text{snare}}$  so  $\Gamma_c$  is relatively flat and the boundary density is undepleted,  $\Gamma_c^* \approx \Gamma_{\text{snare}}$ . (B) Intermediate patch growth ( $\Gamma_{\text{crit}}^1 < \Gamma_{\text{snare}} < \Gamma_{\text{crit}}^2$ ). As for the slow regime the SNARE profile is diffusion-depleted near the boundary. However patch growth is now fast relative to complex diffusion such that  $l_{\text{comp}} < \delta_{\text{snare}}$ ; only a portion of those complexes generated in the patch catch up with the boundary before it moves on and the boundary density is depleted,  $\Gamma_c^* < \Gamma_{\text{snare}}$ . (C) Fast patch growth ( $\Gamma_{\text{snare}} > \Gamma_{\text{crit}}^2$ ). SNARE binding is slow compared to patch growth so SNARE density is little depleted at the boundary and  $\delta_{\text{snare}}$  is large. As for the intermediate regime,  $l_{\text{comp}} < \delta_{\text{snare}}$  but the complex boundary density is even more depleted relative to  $\Gamma_{\text{snare}}$ . doi:10.1371/journal.pone.0006375.g003

**Fast regime,**  $\delta_{\text{snare}} > l_{\text{snare}} > l_{\text{comp}}$  (Fig. 3C). Since the SNARE penetration depth is larger than the SNARE diffusion length,  $\delta_{\text{snare}}$  is determined by coherent patch motion rather than diffusion. After entering the patch SNAREs are left behind a distance  $\delta_{\text{snare}} = v_{\text{patch}}/k_{\text{snare}}\Gamma_s^*$  by the boundary in their survival time  $\approx (k_{\text{snare}}\Gamma_s^*)^{-1}$ . Another consequence of  $l_{\text{snare}} > l_{\text{comp}}$  is that SNAREs are almost undepleted at the boundary,  $\Gamma_s^* \approx \Gamma_{\text{snare}}$ . However since  $\delta_{\text{snare}} > l_{\text{comp}}$ , SNARE complex diffusion is inefficient over the region of complex production and complexes are depleted over the entire penetration length. Thus there is a hole in the complex density profile with slope  $S \approx \Gamma_{\text{snare}}/\delta_{\text{snare}}$ . Due to diffusive mixing the complex boundary density is approximately equal to the average density over the region within the diffusion length  $l_{\text{comp}}$  of the boundary,  $\Gamma_c^* \approx Sl_{\text{comp}}$ . Using this in  $v_{\text{patch}} = kT\Gamma_c^*/\eta_d$  leads to the patch velocity expression of eq. 8 for the fast regime,  $v_{\text{patch}} = v_0\mu^{1/3}(\Gamma_{\text{snare}}/\Gamma_0)^{2/3}$ . Self-consistency ( $\delta_{\text{snare}} > l_{\text{snare}}$ ) then leads to the requirement  $\Gamma_{\text{snare}} > \Gamma_{\text{crit}}^2$  with  $\Gamma_{\text{crit}}^2$  given by eq. 11.

**Intermediate regime,**  $l_{\text{snare}} > \delta_{\text{snare}} > l_{\text{comp}}$  (Fig. 3B). This regime pertains for intermediate values of the SNARE density,  $\Gamma_{\text{crit}}^1 < \Gamma_{\text{snare}} < \Gamma_{\text{crit}}^2$ . This corresponds to the situation where both interfacial densities  $\Gamma_s^*$  and  $\Gamma_c^*$  are depleted. The resulting power law  $v_{\text{patch}} \sim \Gamma_{\text{snare}}^{4/5}$  has exponent 4/5 lying between the 2/3 and 1 values for the fast and slow regimes, respectively. The reader is referred to the Supplementary Material S1 for the derivation.

## Parameter Values

In the following subsection the scaling solutions will be evaluated using realistic parameter values taken from or inferred from the literature, listed in table 1. The model equations will be numerically solved using these values and compared to the scaling predictions. This subsection describes how we are led to the values in Table 1.

**Directly controllable parameters: tension, intermembrane separation and SNARE density.** (i) Micropipette control allows direct regulation of GUV tension over a large range of values, shown in Table 1. (ii) Thus the initial separation between membranes in the GUV-GUV or GUV-SBL contact zone before patch nucleation is an experimentally variable parameter, being determined by tension and applied pressure.

**Table 1.** Parameter values for SNARE-mediated adhesion kinetics model.

| Symbol             | Meaning                       | Value                          | Source               |
|--------------------|-------------------------------|--------------------------------|----------------------|
| $k_{\text{snare}}$ | SNARE binding rate constant   | $0.078 \mu\text{m}^2/\text{s}$ | [33,42] <sup>*</sup> |
| $D_s$              | Uncomplexed SNARE diffusivity | $2.6 \mu\text{m}^2/\text{s}$   | [23] <sup>†</sup>    |
| $D_c$              | SNARE complex diffusivity     | $1.3 \mu\text{m}^2/\text{s}$   | [23] <sup>‡</sup>    |
| $\eta_d$           | Patch growth drag coefficient | $10^{-3} \text{ Pa s}$         | ¶                    |
| $R_{\text{snare}}$ | SNARE complexation range      | 8 nm                           | [33]                 |
| $d$                | Initial membrane separation   | 3–61 nm                        | §                    |
| $\gamma$           | GUV membrane tension          | $10^{-6}-10^{-2} \text{ N/m}$  | [35]**               |

(\*)Estimated using kinetic data for solubilized SNARE complexation [42] and  $R_{\text{snare}}$  from ref. [33].

(†)Average of syntaxin and synaptobrevin diffusivities in GUVs measured in [23].

(‡)We estimate  $D_c = D_s/2$ .

(¶)For *in vitro* experiments we take  $\eta_d$  equal to the viscosity of water.

(§)Minimum separation set by hydration forces [53]. Upper bound calculated from eq. 1 for lowest reported controllable GUV tension [35].

(\*\*)Range of controllable tensions from ref. [35]. Upper bound corresponds to rupture tension.

doi:10.1371/journal.pone.0006375.t001

Ref. [36] describes a heavy-GUV-substrate contact zone where the pressure  $P$  due to gravity is related to membrane tension and the GUV radius  $R_v$  by  $P = \gamma/R_v$ , a relation which holds also if the pressure is applied by micropipette force. We used this relation together with the relationship between pressure, tension, and separation of eq. 1 to give the  $d$  values of Table 1. From the results of ref. [39] with van der Waals interactions set to zero we calculated the tension- and pressure-dependent prefactor  $C$  in eq. 1. We found  $C = 0.97$  for the lower bound tension of Table 1; this increases five-fold over the range of tensions. Note that at physiological salt concentrations the range where van der Waals forces are strong is  $\sim 5$  nm while hydration and electrostatic forces are even shorter range [37,38]. Thus for almost all of the calculated separations in Table 1,  $3 \text{ nm} < d < 61 \text{ nm}$  such that entropic repulsions dominate, justifying our use of eq. 1. Note that for most experimental tension values the membrane separation exceeds the SNARE complexation range, as assumed by our model. (iii) Patch growth is driven by SNARE density  $\Gamma_{\text{snare}}$  in the contacting membrane surfaces. We estimate the maximum attainable value is the density  $\Gamma_{\text{snare}} \approx 10^4/\mu\text{m}^2$  where sizable defects were observed for t-SNARE-reconstituted SBLs [10]. Below a certain level non-specific adhesion effects may swamp SNARE adhesion. As a practical lower bound we take the value  $10^2/\mu\text{m}^2$  used in ref. [10,12], among the lowest reported *in vitro* values. The range represents a two-decade SNARE density window to test GUV adhesion kinetics. For comparison, in cells the SNARE density presumably depends on organelle or vesicle type. A report of synaptic vesicle composition suggests  $\Gamma_{\text{snare}} \approx 10^4/\mu\text{m}^2$  [43].

**SNARE diffusivities.** Bacia et al report values  $2.5 \mu\text{m}^2/\text{s}$  and  $2.7 \mu\text{m}^2/\text{s}$  for diffusivities of, respectively, syntaxin and synaptobrevin in GUVs [23] while  $3.4 \mu\text{m}^2/\text{s}$  was measured in ref. [24] for synaptobrevin in GUVs. In SBLs the value  $0.8 \mu\text{m}^2/\text{s}$  was measured for t-SNAREs [44]. For our model calculations we take equal v- and t-SNARE diffusivities equal to a representative value  $D_s = 2.6 \text{ m}^2/\text{s}$ .

**SNARE complex diffusivity.** A key parameter is the diffusivity  $D_c$  of a SNARE complex pinning two membranes together. We are not aware of measurements of this quantity. However, SNARE-adhered LUVs were mobile on GUV surfaces [24] suggesting SNARE complexes are mobile. For our model we adopt the simplest picture where the drag coefficient of a complex is the sum of the coefficients of the 2 SNAREs comprising the complex; the Einstein relation then implies  $D_c = D_s/2$  for uncomplexed SNAREs with equal diffusivities. Now because a SNARE complex pins two the membrane surfaces at a point (Fig. 1C) the diffusing complex must drag with it a double cone-like membrane structure (Fig. 1C). It is possible this may considerably increase its total drag coefficient and reduce  $D_c$  from our simple estimate above.

**SNARE reach and 2D SNARE binding rate constant.** The rate constant  $k_{\text{snare}}$  describes SNARE complexation in the 2D membrane world and has not been directly measured, to the best of our knowledge. However the 3D bulk rate constant for solubilized SNAREs was reported in ref. [42],  $k_{\text{snare}}^{3D} = 8.3 \times 10^{-4} \mu\text{m}^3/\text{s}$ . Since this value is far below the diffusion-controlled limit, it can be expressed  $k_{\text{snare}}^{3D} = Q\alpha R_{\text{snare}}^3$  where  $Q$  is the conditional binding rate given overlap of two cognate SNAREs and the SNARE reach  $R_{\text{snare}}$  is analogous to the capture radius concept for chemical reactions. Assuming the local rate  $Q$  is unchanged in the membrane, one can similarly write  $k_{\text{snare}} = Q\alpha' R_{\text{snare}}^2$ . Taking, respectively, spherical and circular “reaction” regions the prefactors are  $\alpha = 4\pi/3$ ,  $\alpha' = 2\pi$ . Thus  $k_{\text{snare}} = (3/4)k_{\text{snare}}^{3D}/R_{\text{snare}} = 0.078 \mu\text{m}^2/\text{s}$  after using  $R_{\text{snare}} = 8 \text{ nm}$  for SNARE reach. The latter is based on ref. [33]

where forces in SNARE-reconstituted mica-supported lipid bilayers were measured with the surface force apparatus and SNAREs first interacted at membrane separation 8 nm.

**Patch drag coefficient,  $\eta_d$ .** The model of ref. [32] concluded that drag forces opposing patch growth are primarily due to hydrodynamic dissipation at the patch edge as intermembrane water is expelled, and  $\eta_d$  equals the viscosity of water multiplied by a geometric factor related to the angle at the membrane wedge just outside the patch. For simplicity we assume the geometric factor is close to unity. Thus we estimate the drag coefficient equals the viscosity of water,  $\eta_d = 10^{-3}$  Pa s.

### Numerical Results and Confirmation of Scaling Laws

Using the parameter values of Table 1, in this subsection we obtain exact numerical solutions of the model describing SNARE-mediated adhesion, eqs. 4–7. The solution method is outlined in the Supplementary Material S1. The numerical solutions are compared to the analytical scaling results evaluated using the same parameter values. Numerical data and scaling predictions are in very close agreement.

**Results for Table 1 parameters.** Figure 4 presents numerical results for patch velocity versus SNARE density. Table 1 parameters correspond to  $\epsilon = 0.5$ ,  $\mu = 0.06$ . Plotted for comparison are the power law analytical results of eq. 8. The agreement with the scaling predictions is excellent in the slow and fast regimes: the power laws with exponents 1 and 2/3 are unambiguously confirmed. The results indicate the intermediate regime is “squeezed out” for these parameter values, as expected since the diffusivity ratio  $\epsilon$  is close to 1.

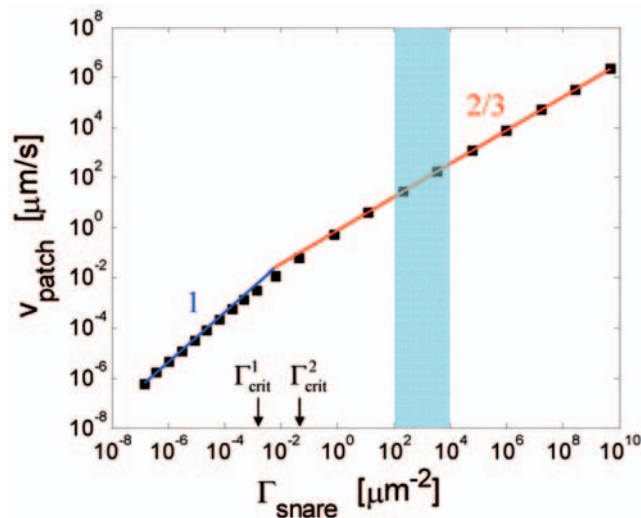

**Figure 4. Model predictions for patch growth velocity as a function of SNARE density.** Squares: exact numerical solutions of adhesion model using linear drag law (eq. 3) and table 1 parameters (corresponding dimensionless parameters:  $\epsilon = 0.5$ ,  $\mu = 0.06$ ). Solid lines show power law predictions of scaling analysis (eq. 8) for slow (blue) and fast (red) growth regimes with indicated exponents. The numerical results confirm the asymptotic power law predictions from scaling analysis. Note the intermediate regime is non-existent since critical densities (shown) are not well separated. Error in the scaling predictions (relative to the numerical values) is maximum at the crossover from slow to fast regimes (130%), and approaches zero far from the critical densities. Shaded area represents accessible range of  $\Gamma_{\text{snare}}$  values *in vitro* ( $10^2/\mu\text{m}^2$  to  $10^4/\mu\text{m}^2$ ) which are deep in the fast regime. The  $v$ -SNARE density of synaptic vesicles ( $\approx 10^4/\mu\text{m}^2$  [43]) suggests *in vivo*  $\Gamma_{\text{snare}}$  values may lie in this range. doi:10.1371/journal.pone.0006375.g004

The shaded blue window indicates the estimated practically accessible *in vitro* SNARE density range ( $10^2 - 10^4/\mu\text{m}^2$ ). This lies deep in the fast regime, i. e. well to the right of the upper critical density  $\Gamma_{\text{crit}}^2 = 0.048/\mu\text{m}^2$  (eq. 11). The corresponding predicted patch velocities lie in the range  $v_{\text{patch}} = 15 - 340\mu\text{m/s}$  which is in principle readily measurable using optical imaging. Velocities are high near the upper bound density because the SNAREs are dense and many are available to complex and provide osmotic pressure. At this maximum practical density, SNAREs are nearly shoulder-to-shoulder if one takes the maximum packing density to be  $1/R_{\text{snare}}^2 = 1.6 \times 10^4/\mu\text{m}^2$ .

**Results for other parameter values: the universal velocity-density relation.** In Fig. 5 patch velocity predictions are presented for parameter values outside those of Table 1. This is important both because of uncertainty in some parameters, and because the values will presumably depend on the type of SNARE. Now in the model predictions for patch velocity the SNARE diffusivities and complexation rate constant enter only through the dimensionless combinations  $\epsilon, \mu$ . Figure 5A shows numerically calculated velocities versus SNARE density in the slow and intermediate regimes for a range of SNARE parameter values varied through  $\epsilon$  and  $\mu$ . Figure 5B shows the same for the intermediate and fast regimes. SNARE densities were scaled with the critical values ( $\Gamma_{\text{crit}}^1$  or  $\Gamma_{\text{crit}}^2$ ) and patch growth velocities with the corresponding velocities at the regime boundaries (named  $v_{\text{crit}}^1, v_{\text{crit}}^2$  in Fig. 5).

Figure 5 leads to two important conclusions. (1) When SNARE density and patch velocity are scaled as above, the velocity-density relationship *collapses* onto a single universal curve. In other words, all dependence on the parameters characterizing the SNAREs – diffusivities and complexation rate constant – appears only in the critical densities and velocities. (2) The universal curve onto which the numerically obtained data collapses is in very close agreement with our earlier scaling predictions, eq. 8. The predicted power laws in each regime are clearly obeyed.

### Fusion Kinetics

Though adhesion is our main concern in this paper, we briefly consider a very simple model of fusion whose results articulate how adhesion and fusion may be coupled. Past theoretical work on fusion has focused mainly on protein-free membranes. Energy barriers to access intermediate high-curvature membrane structures on the pathway to fusion were calculated [45,46]. It has been proposed that similar lipidic structures may be realized in protein-mediated fusion [3,47]. We are not aware of first principles models quantitatively predicting the kinetics of SNARE-mediated fusion, based on a microscopic picture from the SNAREs upward.

Here we invoke the simplest imaginable model for SNARE-induced GUV fusion: each SNARE complex in the patch can trigger fusion with a certain probability per unit time,  $1/\tau_{\text{fus}}$ , *independently* of all others. Only one such event can occur, assuming fusion results in immediate and irreversible conversion of the adhered vesicles into a single vesicle.

What is the delay before fusion occurs? This depends on the mean fusion time  $\tau_{\text{fus}}$  for a single SNARE complex, but also on how rapidly the total number of SNARE complexes in the patch increases with time; the more SNAREs, the higher the fusion probability per unit time. Thus fusion kinetics depend on the adhesion kinetics we have analyzed.

**Calculation of distribution of fusion times.** Adhesion kinetics analyzed in previous subsections determine the number of SNARE complexes  $N_{\text{comp}}(t)$  created in the patch after time  $t$ . For constant velocity  $v_{\text{patch}}$ ,



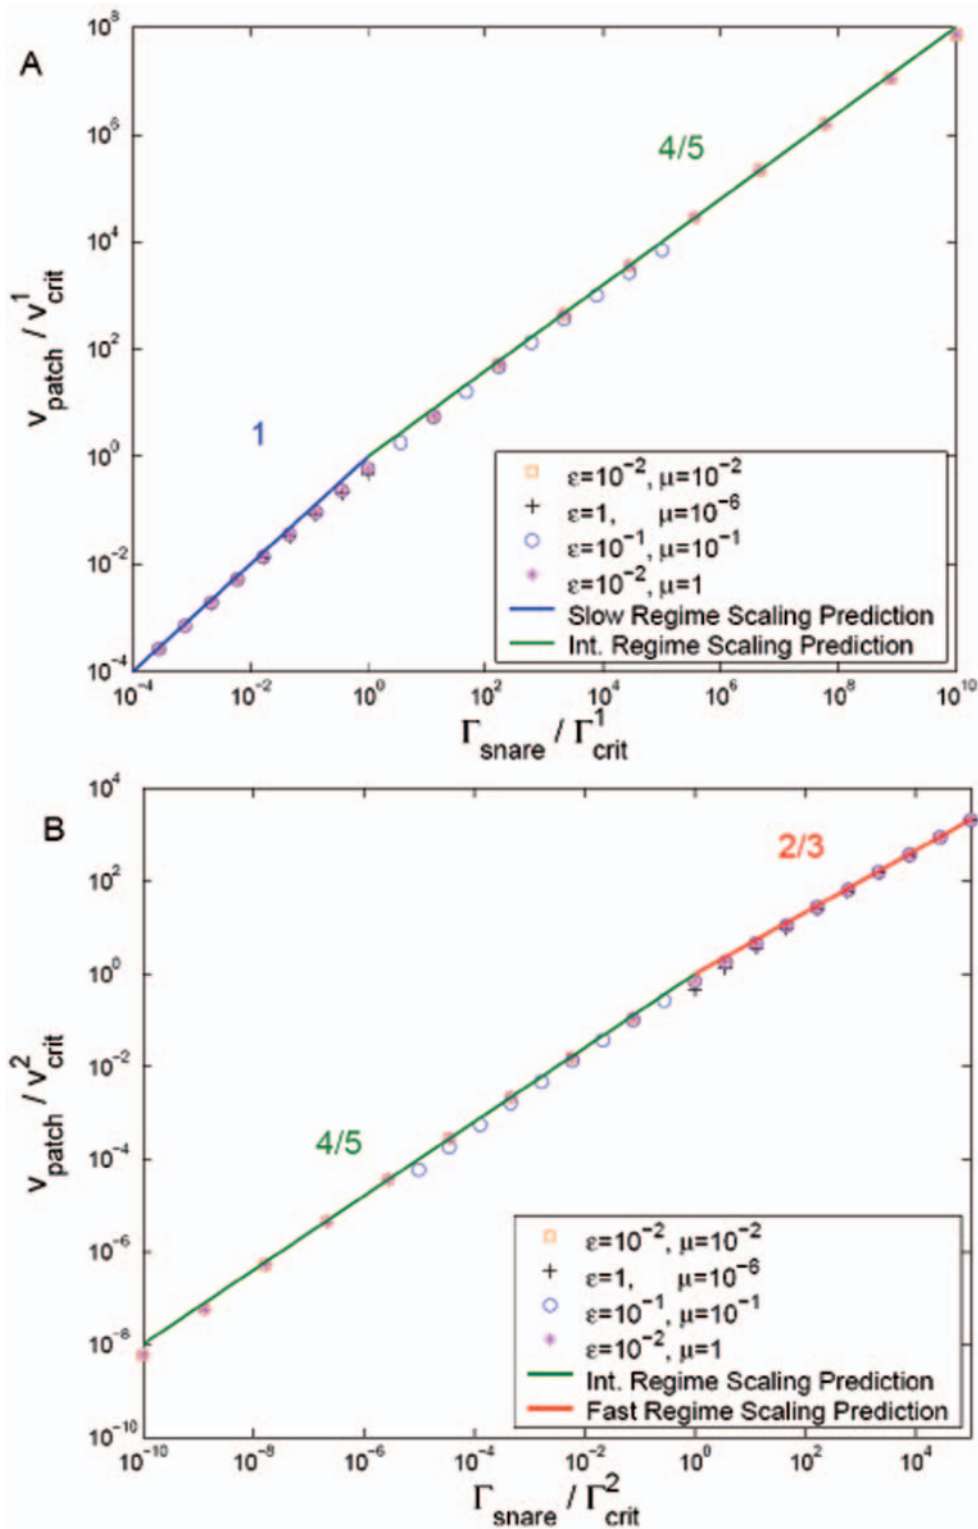

**Figure 5. Collapse of scaled SNARE-mediated adhesion data onto universal patch growth laws.** Symbols indicate exact numerical solutions of patch growth model using the linear drag law (eq. 3). SNARE parameters are varied through the dimensionless combinations  $\epsilon = D_c/D_s$  and  $\mu = k_{\text{snare}}/D_c$  as shown. Solid lines indicate scaling analysis power law solutions (eq. 8) for slow (blue), intermediate (green), and fast (red) growth regimes with indicated exponents. (A) Patch velocity versus SNARE density in slow and intermediate regimes. Density scaled by  $\Gamma_{\text{crit}}^1$  and velocity scaled by the corresponding patch velocity  $v_{\text{crit}}^1 = \epsilon^2 \mu v_0$ . The right-most point of each data set corresponds to  $\Gamma_{\text{snare}} = \Gamma_{\text{crit}}^1$ . (B) As for (A), but for intermediate and fast regimes. Densities and velocities scaled, respectively, by  $\Gamma_{\text{crit}}^2$  and  $v_{\text{crit}}^2 = \epsilon^{-2} \mu v_0$ . The left-most point of each data set corresponds to  $\Gamma_{\text{snare}} = \Gamma_{\text{crit}}^2$ ; note the width of the intermediate regime is larger for smaller values of  $\epsilon$ . Numerical results confirm the asymptotic solutions with relative errors in velocity peaking at the critical densities (70% in (A) and 44% in (B)) and approaching zero far from the critical densities in each regime. doi:10.1371/journal.pone.0006375.g005



$$N_{\text{comp}}(t) = \pi(v_{\text{patch}} t)^2 \Gamma_{\text{snare}} . \quad (12)$$

Assuming each SNARE complex triggers fusion independently from all others in the mean time  $\tau_{\text{fus}}$ , the (“survival”) probability that no fusion has occurred after time  $t$  is

$$S(t) = \exp\left\{-\frac{1}{\tau_{\text{fus}}} \int_0^t N_{\text{comp}}(t') dt'\right\} . \quad (13)$$

This is the product of factors  $e^{-N_{\text{comp}}(t')dt'/\tau_{\text{fus}}}$ , namely the probability no fusion occurs in the interval  $dt'$  given fusion probability per unit time  $1/\tau_{\text{fus}}$ .

The distribution of fusion times is thus

$$p_{\text{fus}}(t) = -\frac{dS(t)}{dt} = \frac{N_{\text{comp}}(t)}{\tau_{\text{fus}}} \exp\left\{-\frac{1}{\tau_{\text{fus}}} \int_0^t N_{\text{comp}}(t') dt'\right\} . \quad (14)$$

Inserting the particular form  $N_{\text{comp}} \sim t^2$  of eq. 12 gives

$$p_{\text{fus}}(t) \propto t^2 e^{-0.71(t/T_{\text{fusion}})^3} , \quad (15)$$

where the mean fusion time is

$$T_{\text{fusion}} = 0.88 \left( \frac{\tau_{\text{fus}}}{v_{\text{patch}}^2 \Gamma_{\text{snare}}} \right)^{1/3} . \quad (16)$$

This distribution of fusion times  $p_{\text{fus}}(t)$  is very broad (see Fig. 6). It follows that  $T_{\text{fusion}} = 2.1 \tau_{\text{fus}}/N_{\text{fusion}}$  where  $N_{\text{fusion}} = \pi(v_{\text{patch}} T_{\text{fusion}})^2 \Gamma_{\text{snare}}$  is the number of complexes assembled in the patch by the mean fusion time. This quantifies how fusion is accelerated when many SNAREs act in parallel.

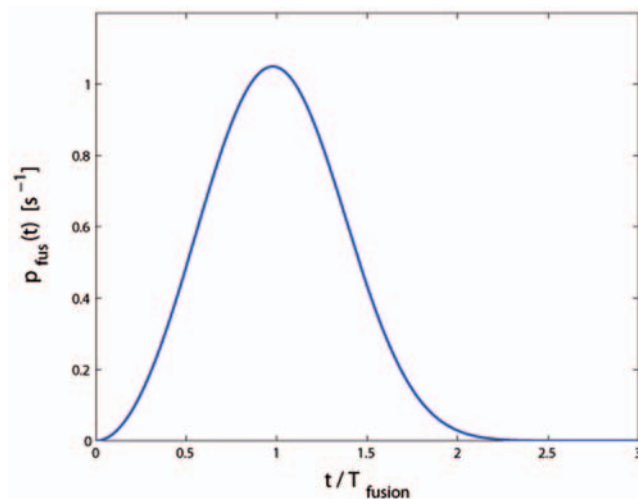

**Figure 6. Predicted distribution of fusion times in the many-SNARE fusion regime (eq. 15).** The distribution of fusion times is very broad,  $p_{\text{fus}}(t) \sim t^2 e^{-0.71(t/T_{\text{fusion}})^3}$ , characterized by the mean fusion time  $T_{\text{fusion}}$  determined by SNARE density. Time is measured from the instant of adhesion patch nucleation. doi:10.1371/journal.pone.0006375.g006

**Prediction for mean vesicle fusion time.** The mean vesicle fusion time given by eq. 16 depends on the SNARE density and patch velocity. Thus we predict three regimes of fusion kinetics depending on SNARE density corresponding to the three regimes of adhesion kinetics. The dependence of the mean vesicle fusion time on SNARE density is obtained by combining the predictions for patch velocity of eq. 8 for each regime with eq. 16:

$$\frac{T_{\text{fusion}}}{\tau_0} = \begin{cases} \Gamma_0/\Gamma_{\text{snare}} , & \Gamma_{\text{snare}} < \Gamma_{\text{crit}}^1 \text{ (slow)} \\ \epsilon^{-4/15} \mu^{-2/15} (\Gamma_0/\Gamma_{\text{snare}})^{13/15} , & \Gamma_{\text{crit}}^1 < \Gamma_{\text{snare}} < \Gamma_{\text{crit}}^2 \text{ (intermediate)} \\ \mu^{-2/9} (\Gamma_0/\Gamma_{\text{snare}})^{7/9} , & \Gamma_{\text{snare}} > \Gamma_{\text{crit}}^2 \text{ (fast)} \end{cases} \quad (17)$$

where a new timescale appears,  $\tau_0 = 0.88 (\tau_{\text{fus}}/(v_0^2 \Gamma_0))^{1/3}$ . Note that for the parameters of Table 1 adhesion and fusion kinetics lie deep in the fast regime where  $T_{\text{fusion}} \sim \Gamma_{\text{snare}}^{-7/9}$ . Thus as density is increased from the minimum to maximum values of the accessible *in vitro* range ( $10^2 - 10^4/\mu\text{m}^2$ ) the mean fusion time is predicted to be reduced by a factor of  $\sim 36$ . This strong dependence of  $T_{\text{fusion}}$  on SNARE density is because increasing  $\Gamma_{\text{snare}}$  speeds up fusion by increasing the number of SNARE complexes in the patch in two ways: (i) increasing the patch growth rate (eq. 8), and (ii) increasing the SNARE complex density inside the patch.

The above analysis implicitly assumed that before the fusion event sufficient time had elapsed that a steady state adhesion patch had been established ( $T_{\text{fusion}} > \tau_{\text{trans}}$ ) containing many complexes ( $N_{\text{fusion}} \gg 1$  or  $T_{\text{fusion}} < \tau_{\text{fus}}$ ). Here  $\tau_{\text{trans}}$  is the duration of the transient growth regime following nucleation at  $t=0$  but preceding steady state. Thus eq. 17 is self-consistent provided

$$\tau_{\text{trans}} < T_{\text{fusion}} < \tau_{\text{fus}} . \quad (18)$$

The second inequality can be restated as

$$\tau_{\text{fus}} > 0.28 \left/ \left( \Gamma_{\text{snare}} v_{\text{patch}}^2 \right)^{1/2} \right. . \quad (19)$$

In the Discussion section we argue that these inequalities are satisfied for some *in vitro* systems.

**Single SNARE fusion.** Finally, if the single SNARE fusion time  $\tau_{\text{fus}}$  is so small that after patch nucleation a second complex had insufficient time to develop then fusion is triggered by a single SNARE. In this case  $T_{\text{fusion}} = \tau_{\text{fus}}$  and fusion times follow a simple Poisson distribution,  $p_{\text{fus}}(t) = \tau_{\text{fus}}^{-1} e^{-t/\tau_{\text{fus}}}$ . Now the complex production rate just after patch nucleation by the very first complex is  $k_{\text{snare}} \Gamma_{\text{snare}}^2 A_0$  where  $A_0$  is the area surrounding the first complex where cognate SNAREs can reach one other. From Helfrich theory [38] we estimate  $A_0 = (4\pi^3 \kappa/kT) R_{\text{snare}}^2$  where  $\kappa$  is the membrane bending modulus. Thus the condition for single SNARE fusion kinetics is estimated as

$$\tau_{\text{fus}} < kT / (4\pi^3 \kappa k_{\text{snare}} \Gamma_{\text{snare}}^2 R_{\text{snare}}^2) , \text{ (single-SNARE fusion)} \quad (20)$$

## Discussion

In this paper we modeled interactions between two large SNARE-reconstituted membranes as in GUV-GUV or GUV-SBL

experiments. Such experiments are relatively unexplored but may provide unique information unavailable from the widely exploited SUV-based methods. We predict SNARE complexation creates an adhesion patch whose growth rate is determined by SNARE density.

### Predictions of model: power law increase of adhesion patch growth rate with SNARE density

Using parameter values inferred from available experimental data (see Table 1) results are shown in Fig. 4. Patch growth velocity is driven by the initial SNARE surface density and grows as a power law,  $v_{\text{patch}} \sim \Gamma_{\text{snare}}^{2/3}$ , a directly testable prediction. Predicted patch growth speeds are  $10 - 300 \mu\text{m/s}$  for typical *in vitro* SNARE densities ( $10^2/\mu\text{m}^2 - 10^4/\mu\text{m}^2$ ).

### Three patch velocity regimes

At low SNARE densities ( $\Gamma_{\text{snare}} < \Gamma_{\text{crit}}^1$ ) we found uniform complex density in the patch and  $v_{\text{patch}} \sim \Gamma_{\text{snare}}$  is independent of SNARE complexation rate constant  $k_{\text{snare}}$  (slow regime). This was identified in ref. [32]. At intermediate ( $\Gamma_{\text{crit}}^1 < \Gamma_{\text{snare}} < \Gamma_{\text{crit}}^2$ ) and high ( $\Gamma_{\text{snare}} > \Gamma_{\text{crit}}^2$ ) densities  $v_{\text{patch}} \sim \Gamma_{\text{snare}}^{4/5}$  and  $v_{\text{patch}} \sim \Gamma_{\text{snare}}^{2/3}$ , respectively (intermediate and fast regimes). Increased growth rate now outstrips diffusion of complexes whose density at the patch boundary is thus depleted resulting in progressively weaker power laws and growth rates depending on  $k_{\text{snare}}$  and diffusivities. These predictions were confirmed by numerical solutions (Figs. 4,5). For the SNARE parameters of Table 1 typical SNARE densities belong to the fast regime. Note the exponent  $\alpha$  in the growth law  $v_{\text{patch}} \sim \Gamma_{\text{snare}}^\alpha$  decreases with increasing SNARE density. This is a general trend and does not require a linear drag law as we assumed to obtain the above results. In the Supplementary Material S1 we treat the alternative (non-linear) drag law proposed in ref. [32],  $\Pi_{\text{drag}} \sim v_{\text{patch}}^{2/3}$ . We find qualitatively unchanged behavior, but growth exponents are modified to 3/2, 1, and 3/4 in the slow, intermediate, and fast regimes, respectively (see Supplementary Figure S1).

### Prediction of constant patch growth velocity

We found that our model equations describing SNARE density profile evolution and patch growth (eqs. 1–3 of the Supplementary Material S1) have long time solutions where the patch grows at constant velocity,  $v_{\text{patch}}$ . The solutions obey eqs. 5–7 in the main text. We stress that constant patch velocity is not an assumption of our model but emerges from the governing equations. The following stability argument helps to physically motivate why patch growth speed settles down to a constant value  $v_{\text{patch}}$ . Were patch growth to momentarily diminish from this value, say, additional time would be available for SNARE complexes to assemble in the patch and diffuse to the boundary, boosting the complex boundary density and osmotic pressure and tending to restore the velocity to its former higher level. On the other hand a sudden increase in velocity relative to the steady state value would deplete the complex boundary density and tend to drive the patch velocity down again.

### Transient preceding constant patch growth

The constant patch growth regime and the main results presented here are valid at times sufficiently large that patch size exceeds the size of the region close to the boundary where SNARE and complex density profiles change. In the fast regime the requirement is that patch size exceeds the SNARE penetration depth  $\delta_{\text{snare}}$  which is the size of the depletion region in the complex density profile within the patch. For the practically

accessible SNARE density range indicated in fig. 4 this scale ranges from  $0.5 - 2 \mu\text{m}$ .

### Other parameter values

Understanding adhesion kinetics for parameter values besides those in Table 1 is important. (i) Different SNARE types within presumably have different parameter sets. (ii) Future GUV studies may enable more confident inference of parameter values such as  $k_{\text{snare}}$  by fitting model predictions to experiment. (iii) Some parameters may be experimentally manipulated, e.g. by using recombinant SNAREs with modifications or drugs such as toxins which cleave SNAREs at specific sites. Physical properties could be adjusted (e.g. the drag coefficient  $\eta_d$  by high viscosity additives). Scaling analysis showed that patch kinetics depend on parameters through the combinations  $\epsilon \equiv D_s/D_c$  and  $\mu \equiv k_{\text{snare}}/D_s$  only. An important prediction from scaling analysis, confirmed numerically, is that patch growth versus SNARE density collapses onto universal curves for different parameter values (Fig. 5).

### Validity of 2D SNARE complexation kinetics

In the tightly adhered patch region we assumed apposing membranes were so close that SNAREs are in reach of each other when laterally aligned. This is a reasonable assumption since already formed SNARE complexes themselves are the agents holding the membranes together. Thus a complexation event within a developed patch does not require local bending of the membranes toward one another to bring cognate SNAREs together. Hence complexation kinetics are effectively 2D, with 2D SNARE binding rate constant  $k_{\text{snare}}$ . This assumption is valid provided the mean membrane undulation amplitude  $\langle u^2 \rangle^{1/2}$  is less than the SNARE reach  $R_{\text{snare}}$ . Applying the Helfrich formula  $\langle u^2 \rangle = kT/(4\pi^3\kappa)A$  for a membrane patch of typical bending modulus  $\kappa = 20kT$  [35] and area  $A = 1/\Gamma_{\text{snare}}$  (the mean area between complexes in the patch since  $\Gamma_c = \Gamma_{\text{snare}}$  away from boundary) yields the necessary condition  $\Gamma_{\text{snare}} > 6/\mu\text{m}^2$ . This is easily satisfied for typical experimental SNARE densities (see Fig. 4). For the lowest densities, some corrections may be expected because complex density may be reduced near the patch boundary.

### Fusion kinetics are coupled to adhesion kinetics

Implementing the simplest assumption that complexes promote fusion independently, we found a broad distribution of fusion times  $p_{\text{fus}}(t) \sim t^2 e^{-0.71(t/T_{\text{fusion}})^3}$  where the mean fusion time  $T_{\text{fusion}} \sim 1/\Gamma_{\text{snare}}^\alpha$  decreases at higher SNARE density with a regime-dependent exponent  $\alpha$ . Generally, if fusion is slow enough that many complexes can first assemble the fusion probability per unit time should *increase* due to adhesion kinetics. A second possibility is that the individual SNARE complex fusion time  $\tau_{\text{fus}}$  is so small that fusion would occur almost instantly on production of the first complex. Fusion times would then follow the much less broad exponential one-SNARE distribution,  $p_{\text{fus}}(t) \sim e^{-t/\tau_{\text{fus}}}$ .

### Estimating mean fusion time

Fusion time predictions from our simple fusion model, eq. 17, are self-consistent provided the conditions of eqs. 18, 19 are satisfied. Taking density  $\Gamma_{\text{snare}} = 1000/\mu\text{m}^2$  with table 1 parameters gives  $v_{\text{patch}} = 75 \mu\text{m/s}$  (eq. 8, fast regime) so the requirement of eq. 19 is that the single SNARE complex fusion time  $\tau_{\text{fus}} > 0.1$  ms. We estimate the transient duration as the time for the patch size to grow larger than the depleted region at the boundary of size  $\delta_{\text{snare}}$ ,  $\tau_{\text{trans}} \approx \delta_{\text{snare}}/v_{\text{patch}} \approx 13$  ms. Thus  $T_{\text{fusion}} > 13$  ms is also required. Now the predicted mean GUV fusion time  $T_{\text{fusion}}$  (eq.

16) depends on  $\tau_{\text{fus}}$  which has not been measured. In SUV experiments due to geometric constraints each SUV may be docked and fused by order one SNARE complexes. Thus measured SUV fusion times may provide a crude estimate of  $\tau_{\text{fus}}$ . (i) Using the value  $\tau_{\text{fus}} = 25 \text{ ms}$  from ref. [10], eq. 16 gives  $T_{\text{fusion}} = 1 \text{ ms}$  which belongs to the transient regime. Thus our predicted fusion time is inaccurate but we can conclude fusion occurs in the transient many-SNARE regime. (ii) Using instead  $\tau_{\text{fus}} = 10 \text{ min}$  from refs. [3,9], eq. 16 gives  $T_{\text{fusion}} = 42 \text{ ms}$ . This value satisfies the self-consistency conditions of eq. 18. (iii) With the intermediate value  $\tau_{\text{fus}} = 10 \text{ s}$  from refs. [11,12], eq. 16 gives  $T_{\text{fusion}} = 11 \text{ ms}$ , close to the transient-steady state boundary. This value is approximately self-consistent and provides at least a crude estimate. Note that the single SNARE fusion condition of eq. 20 reads  $\tau_{\text{fus}} < 0.08 \text{ ms}$ ; thus all cases (i)-(iii) are in many-SNARE regimes.

### Patch nucleation

Important issues not addressed here are patch nucleation times and whether additional patches can nucleate before fusion. The probability a second patch nucleates within the fusion time  $T_{\text{fusion}}$  is  $\approx k_{\text{snare}}^{\text{out}} \Gamma_{\text{snare}}^2 A_c T_{\text{fusion}}$ , where  $k_{\text{snare}}^{\text{out}}$  is the reduced binding constant outside the patch. Estimating the initial vesicle-vesicle contact area  $A_c = 10 \mu\text{m}^2$  and using Table 1 parameters with  $T_{\text{fusion}} = 0.25 \text{ s}$ , the condition  $k_{\text{snare}}^{\text{out}}/k_{\text{snare}} \lesssim 5 \times 10^{-4}$  must be satisfied to ensure only one patch develops. An interesting experimental possibility would be to tune  $k_{\text{snare}}^{\text{out}}$  by reducing (increasing) membrane tension to increase (reduce) the membrane separation according to eq. 1.

### Implications for cellular fusion pathways

A possible pathway to cellular fusion is depicted in Fig. 7. Biological membrane tensions  $\gamma$  may be sufficiently low that Helfrich repulsions work against adhesion. Using  $\gamma = 3 \times 10^{-6} \text{ N/m}$  (measured from plasma membrane blebs lacking cytoskeletal adhesion [48]) to estimate the tension of large cellular compartments, eq. 1 predicts membrane approach closer than 37 nm is strongly suppressed (eq. 1). Tethering factor sizes ( $\sim 30 \text{ nm}$  [34]) suggest they may reach across this gap to loosely bind membranes before SNARE-mediated adhesion [49,50], as illustrated in Fig. 7B. The transition of secretory granules between tethered and firmly docked states involved a 20-nm step toward the plasma membrane which presumably corresponded to SNARE adhesion [51]. Thus tethers may establish a contact zone where mean membrane separation exceeds SNARE reach, ready for subsequent complexation events to grow a tight SNARE adhesion patch (Fig. 7A–D) in readiness for fusion (Fig. 7E). An important quantitative difference compared to *in vitro* is that frictional resistance to patch growth may be much higher *in vivo* since estimates of cytoplasmic viscosity [52] range from 1 to  $10^7$  that of water.

## Supporting Information

### Supplementary Materials S1

Found at: doi:10.1371/journal.pone.0006375.s001 (0.10 MB PDF)

**Figure S1** Collapse of scaled SNARE-mediated adhesion data onto a single universal patch growth law. Same as Fig. 5 of the main text, but using non-linear relation between velocity and patch boundary complex density, eq. S19. Symbols indicate exact numerical solutions of patch growth model for a range of parameter values as shown. Solid lines denote scaling predictions. (A) Patch velocity versus SNARE density in slow and intermediate regimes.

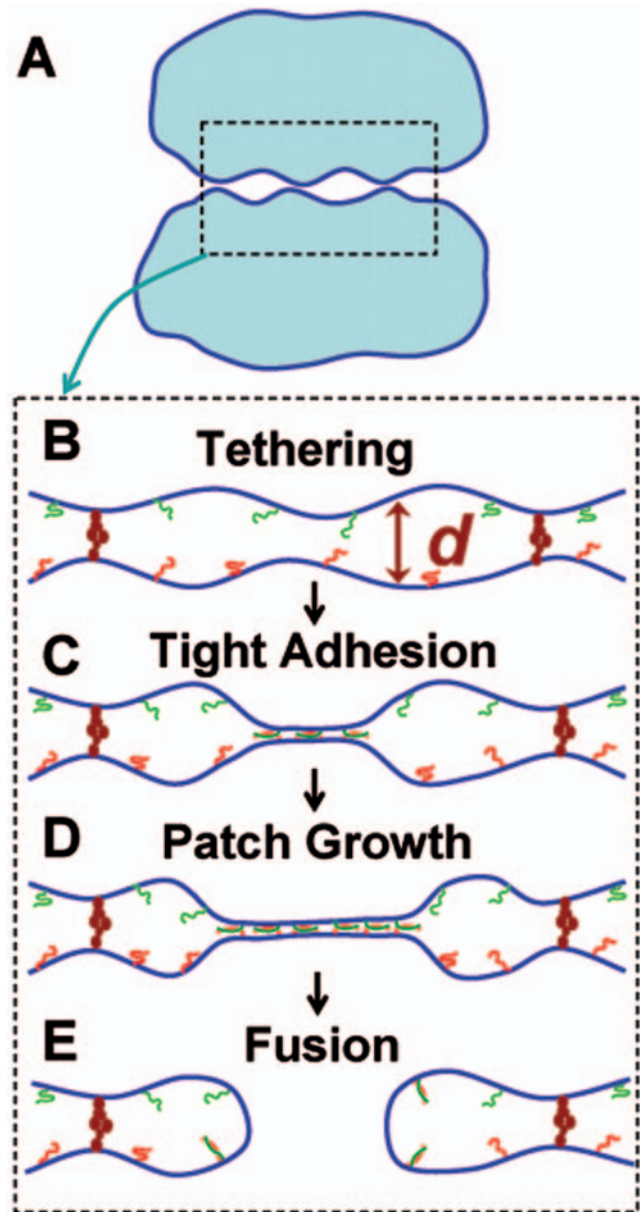

**Figure 7. Tethering factors and possible fusion sequence for large compartments in vivo.** (A) Large micron-scale compartments loosely bound by tethering factors which are thought to mediate the first membrane contact on the fusion pathway. (B–E) Blow-up of boxed region in (A), showing possible sequence from tethering to fusion. (B) Tethering factors (brown) loosely bind the compartments in preparation for SNARE action, setting the initial membrane separation  $d$ . If tether size ( $\sim 30 \text{ nm}$ ) sets  $d > R_{\text{snare}} = 8 \text{ nm}$ , binding of t-SNAREs (red) and v-SNAREs (green) is hindered. (C) After patch nucleation by the first SNARE complex, aided by direct SNARE-tether interactions or membrane fluctuations, complex assembly and patch growth is facilitated by the tightly adhered patch where SNAREs are in reach. SNARE assembly may be regulated and organized by additional factors such as SM proteins (not shown). (D) As more complexes develop, the self-promoting adhesion patch grows, possibly driven by SNARE complex osmotic pressure. (E) Fusion is triggered within the patch by SNAREs individually or as part of a multi-component fusion machine. doi:10.1371/journal.pone.0006375.g007

Density scaled by  $\Gamma_{\text{crit}}^1$  and velocity scaled by  $v_{\text{crit}}^1 = \varepsilon^{3/2} \lambda^{3/4} v_0$ . (B) As for (A), but for intermediate and fast regimes. Densities and velocities scaled, respectively, by  $\Gamma_{\text{crit}}^2$  and  $v_{\text{crit}}^2 = \varepsilon^{-3/2} \lambda^{3/4} v_0$ .

Numerical results confirm the asymptotic solutions with relative errors in the velocity peaking at the critical densities (106% in (A) and 54% in (B)) and approaching zero far from the critical densities in each regime.

Found at: doi:10.1371/journal.pone.0006375.s002 (0.64 MB TIF)

## References

- Jahn R, Scheller RH (2006) Snares - engines for membrane fusion. *Nat Rev Mol Cell Bio* 7: 631–643.
- Jahn R, Lang T, Sudhof TC (2003) Membrane fusion. *Cell* 112: 519–533.
- Weber T, Zemelman BV, McNew JA, Westermann B, Gmachl M, et al. (1998) Snares: Minimal machinery for membrane fusion. *Cell* 92: 759–772.
- Sutton RB, Fasshauer D, Jahn R, Brunger AT (1998) Crystal structure of a snare complex involved in synaptic exocytosis at 2.4 angstrom resolution. *Nature* 395: 347–353.
- Chen YA, Scales SJ, Patel SM, Doung YC, Scheller RH (1999) Snare complex formation is triggered by  $Ca^{2+}$  and drives membrane fusion. *Cell* 97: 165–174.
- Xu T, Rammner B, Margittai M, Artalejo AR, Neher E, et al. (1999) Inhibition of snare complex assembly differentially affects kinetic components of exocytosis. *Cell* 99: 713–722.
- Ungermann C, Sato K, Wickner W (1998) Defining the functions of trans-snare pairs. *Nature* 396: 543–548.
- Coorsen JR, Blank PS, Tahara M, Zimmerberg J (1998) Biochemical and functional studies of cortical vesicle fusion: The snare complex and  $Ca^{2+}$  sensitivity. *J Cell Biol* 143: 1845–1857.
- Tucker WC, Weber T, Chapman ER (2004) Reconstitution of  $Ca^{2+}$ -regulated membrane fusion by synaptotagmin and snares. *Science* 304: 435–438.
- Liu TT, Tucker WC, Bhalla A, Chapman ER, Weisshaar JC (2005) Snare-driven, 25-millisecond vesicle fusion in vitro. *Biophys J* 89: 2458–2472.
- Fix M, Melia TJ, Jaiswal JK, Rappoport JZ, You DQ, et al. (2004) Imaging single membrane fusion events mediated by snare proteins. *Proc Natl Acad Sci USA* 101: 7311–7316.
- Bowen ME, Weninger K, Brunger AT, Chu S (2004) Single molecule observation of liposome-bilayer fusion thermally induced by soluble n-ethyl maleimide sensitive-factor attachment protein receptors (snares). *Biophys J* 87: 3569–3584.
- Dennison SM, Bowen ME, Brunger AT, Lentz BR (2006) Neuronal snares do not trigger fusion between synthetic membranes but do promote peg-mediated membrane fusion. *Biophys J* 90: 1661–1675.
- Chen XC, Arac D, Wang TM, Gilpin CJ, Zimmerberg J, et al. (2006) Snare-mediated lipid mixing depends on the physical state of the vesicles. *Biophys J* 90: 2062–2074.
- Duman JG, Forte JG (2003) What is the role of snare proteins in membrane fusion? *Am J Physiol-Cell Ph* 285: C237–C249.
- Wolfe M, Schneggenburger R (2003) Presynaptic capacitance measurements and  $Ca^{2+}$  uncaging reveal submillisecond exocytosis kinetics and characterize the  $Ca^{2+}$  sensitivity of vesicle pool depletion at a fast cns synapse. *J Neurosci* 23: 7059–7068.
- Wang L, Seeley ES, Wickner W, Merz AJ (2002) Vacuole fusion at a ring of vertex docking sites leaves membrane fragments within the organelle. *Cell* 108: 357–369.
- Luini A, Ragnini-Wilson A, Polishchuck RS, De Matteis MA (2005) Large pleomorphic traffic intermediates in the secretory pathway. *Curr Opin Cell Biol* 17: 353–361.
- Bakker AC, Webster P, Jacob WA, Andrews NW (1997) Homotypic fusion between aggregated lysosomes triggered by elevated  $[Ca^{2+}]_i$  in fibroblasts. *J Cell Sci* 110: 2227–2238.
- Jamieson BGM, Koehler L, Todd BJ (1995) Spermatozoal ultrastructure in 3 species of parrots (aves, psittaciformes) and its phylogenetic implications. *Anat Rec* 241: 461–468.
- Wessel GM, Brooks JM, Green E, Haley S, Voronina E, et al. (2001) The biology of cortical granules. In: *Int. Rev. Cytol.*, volume 209 of *International Review of Cytology—a Survey of Cell Biology*. pp 117–206.
- Giraudo CG, Hu C, You DQ, Slovic AM, Mosharov EV, et al. (2005) Snares can promote complete fusion and hemifusion as alternative outcomes. *J Cell Biol* 170: 249–260.
- Bacia K, Schuette CG, Kahya N, Jahn R, Schwille P (2004) Snares prefer liquid-disordered over “raft” (liquid-ordered) domains when reconstituted into giant unilamellar vesicles. *J Biol Chem* 279: 37951–37955.
- Tareste D, Shen J, Melia T, Rothman J (2007) Snarepin/munc18 promotes adhesion and fusion of large vesicles to giant membranes. *Proc Natl Acad Sci USA* 105: 2380–2385.
- Boulbitch A, Guttenberg Z, Sackmann E (2001) Kinetics of membrane adhesion mediated by ligand-receptor interaction studied with a biomimetic system. *Biophys J* 81: 2743–2751.
- Cuvelier D, Nassoy P (2004) Hidden dynamics of vesicle adhesion induced by specific stickers. *Phys Rev Lett* 93.
- Smith A, Sengupta K, Goennenwein S, Seifert U, Sackmann E (2008) Force-induced growth of adhesion domains is controlled by receptor mobility. *Proc Natl Acad Sci USA* 105: 6906–6911.
- Reister-Gottfried E, Sengupta K, Lorz B, Sackmann E, Seifert U, et al. (2008) Dynamics of specific vesicle-substrate adhesion: from local events to global dynamics. *Phys Rev Lett* 101: 208103.
- Dubin-Thaler BJ, Giannone G, Dobreiner HG, Sheetz MP (2004) Nanometer analysis of cell spreading on matrix-coated surfaces reveals two distinct cell states and steps. *Biophys J* 86: 1794–1806.
- Chamaroux F, Fache S, Bruckert F, Fourcade B (2005) Kinetics of cell spreading. *Phys Rev Lett* 94.
- Cuvelier D, Thery M, Chu YS, Dufour S, Thiery JP, et al. (2007) The universal dynamics of cell spreading. *Curr Biol* 17: 694–699.
- de Gennes PG, Puech PH, Brochard-Wyart F (2003) Adhesion induced by mobile stickers: A list of scenarios. *Langmuir* 19: 7112–7119.
- Li F, Pincet F, Perez E, Eng W, Melia T, et al. (2007) Energetics and dynamics of snarepin folding across lipid bilayers. *Nat Struct Mol Biol* 14: 890–896.
- Munson M, Novick P (2006) The exocyst defrocked, a framework of rods revealed. *Nat Struct Mol Biol* 13: 577–581.
- Evans E, Rawicz W (1990) Entropy-driven tension and bending elasticity in condensed-fluid membranes. *Phys Rev Lett* 64: 2094–2097.
- Puech PH, Brochard-Wyart F (2004) Membrane tensiometer for heavy giant vesicles. *Eur Phys J E* 15: 127–132.
- Evans E (1991) Entropy-driven tension in vesicle membranes and unbinding of adherent vesicles. *Langmuir* 7: 1900–1908.
- Helfrich W, Servuss RM (1984) Undulations, steric interaction and cohesion of fluid membranes. *Nuovo Cimento D* 3: 137–151.
- Radler JO, Feder TJ, Strey HH, Sackmann E (1995) Fluctuation analysis of tension-controlled undulation forces between giant vesicles and solid substrates. *Phys Rev E* 51: 4526–4536.
- Karatekin E, Sandre O, Guitoumi H, Borghi N, Puech PH, et al. (2003) Cascades of transient pores in giant vesicles: Line tension and transport. *Biophys J* 84: 1734–1749.
- Bell GI, Dembo M, Bongrand P (1984) Cell-adhesion - competition between nonspecific repulsion and specific bonding. *Biophys J* 45: 1051–1064.
- Pobbatu AV, Stein A, Fasshauer D (2006) N- to c-terminal snare complex assembly promotes rapid membrane fusion. *Science* 313: 673–676.
- Takamori S, Holt M, Stenius K, Lemke EA, Grønborg M, et al. (2006) Molecular anatomy of a trafficking organelle. *Cell* 127: 831–846.
- Wagner ML, Tamm LK (2001) Reconstituted syntaxin1a/snap25 interacts with negatively charged lipids as measured by lateral diffusion in planar supported bilayers. *Biophys J* 81: 266–275.
- Kozlovsky Y, Kozlov MM (2002) Stalk model of membrane fusion: Solution of energy crisis. *Biophys J* 82: 882–895.
- Lec JY, Schick M (2007) Field theoretic study of bilayer membrane fusion iii: Membranes with leaves of different composition. *Biophys J* 92: 3938–3948.
- Kuzmin PL, Zimmerberg J, Chizmadzhev YA, Cohen FS (2001) A quantitative model for membrane fusion based on low-energy intermediates. *Proc Natl Acad Sci USA* 98: 7235–7240.
- Dai JW, Sheetz MP (1999) Membrane tether formation from blebbing cells. *Biophys J* 77: 3363–3370.
- Whyte JRC, Munro S (2002) Vesicle tethering complexes in membrane traffic. *J Cell Sci* 115: 2627–2637.
- Waters MG, Pfeffer SR (1999) Membrane tethering in intracellular transport. *Curr Opin Cell Biol* 11: 453–459.
- Karatekin E, Tran VS, Huet S, Fange I, Cribier S, et al. (2008) A 20-nm step toward the cell membrane preceding exocytosis may correspond to docking of tethered granules. *Biophys J* 94: 2891–2905.
- Schwarz U (2007) Soft matters in cell adhesion: rigidity sensing on soft elastic substrates. *Soft Matter* 3: 263–266.
- Rand R, Parsegian V (1989) Hydration forces between phospholipid bilayers. *Biochim Biophys Acta* 988: 351–376.

## Author Contributions

Conceived and designed the experiments: EK. Analyzed the data: JMW. Wrote the paper: JMW BO. Conceived and designed model: BO. Solved and analyzed model: JMW BO.
